# Supplementary material for: Sentiment Analysis of the Conflict Between Meitei and Kuki Communities of Manipur, India Using YouTube Comments: A Comparative Study of Random Forest, Naïve Bayes, SVM, and KNN
Source: Research Square preprint supplement (doi:10.21203/rs.3.rs-6511780/v1), 2025-04-29
Supplement: Supplementary file 1 [file 9b9666593768fce03161f89a.docx]

**Table 1 Top 10 Most Viewed YouTube Videos (Among 551) on Manipur Conflict**

| Published | ChannelId | Title | Description | Channel | View | Like | Comment |
| --- | --- | --- | --- | --- | --- | --- | --- |
| 2024-03-08 T12:35:01Z | UC8KS4Ekb3z8RBRip87-xFEA | Manipur Crisis 😓 | During my north east ride. | Bong travel Mania | 29435976 | 936341 | 2819 |
| 2023-07-21 T16:20:00Z | UCMk9Tdc-d1BIcAFaSppiVkw | Manipur Violence की Kuki Victim ने Interview में बताई दिल दहलाने वाली हकीकत | Hindi News | मणिपुर के चूराचंदपुर के रिफ्यूजी कैंप के एक कमरे में सन्नाटे के बीच 42 साल की वो महिला रह रही है जिसके ऊपर दरिंदों की भीड़ टूट पड़ी थी। 4 मई को दरिंदगी के उस नंगे नाच में जिन दो महिलाओं की परेड नामर्दों की भीड़ करा रही थी उसमें से एक पीड़िता ने अपना दर्द बयां किया है जो सिहरा देने वाला है। | TIMES NOW Navbharat | 6821739 | 42624 | 5451 |
| 2023-07-21 T06:34:25Z | UCKop7_gs7xq5tbrDDYuplhA | Manipur हम शर्मिंदा हैं! | Why is Manipur Burning? | Manipur Violence | RJ Raunak | A video showing two women of Kuki-Zomi community being paraded naked by a mob led by men in violence-hit Manipur was shared on social media on Wednesday. The video is said to be two-month-old and it was confirmed later that the victims were stripped and paraded naked and later, gang-raped by the men. A police official stated that the nerve-wracking incident happened on May 4. The gut-wrenching incident shook the nation | RJ Raunac | 3311364 | 152919 | 15255 |
| 2023-05-09 T13:00:11Z | UCsDTy8jvHcwMvSZf_JGi-FA | Why is Manipur violence dangerous for India? | Manipur riots explained | Abhi and Niyu | In this video, we will explore the causes and consequences of the 2023 Manipur violence, an ongoing ethnic clash between the Hindu Meitei people and Christian tribal Kuki people in India's northeastern state of Manipur. The violence erupted on May 3 2023 during the "Tribal Solidarity March" called by the All-Tribal Student Union Manipur (ATSUM) to protest the granting of reservations to the majority Meitei community1. The violence killed at least 60 people, and injured at least a further 230. It also resulted in the burning of 25 churches and the displacement of 23,000 people. The Indian Army and the Assam Rifles were deployed to restore law and order, and a shoot-at-sight order was issued in some areas. Internet services were also suspended for five days. We will examine the historical and political background of the conflict, which involves land rights, religious differences, and identity politics. We will also look at the current situation and the prospects for peace and reconciliation in this volatile region. | Abhi and Niyu | 3197470 | 129033 | 6293 |
| 2023-06-19 T05:09:20Z | UCN7B-QD0Qgn2boVH5Q0pOWg | Manipur Violence : मणिपुर में हिंसा क्यों भड़की और इस हिंसा से पड़ी दरार क्या कभी मिट पाएगी (BBC) | भारत के पूर्वोत्तर राज्य मणिपुर में जातीय हिंसा भड़के हुए डेढ़ महीने हो चुके हैं, लेकिन हालात वैसे ही तनावपूर्ण बने हुए हैं. मैतेई और कुकी समुदाय के बीच जारी इस हिंसा में अब तक 100 से ज़्यादा लोगों की जान जा चुकी है और 390 लोग घायल हैं. हिंसा ना थमने की वजह क्या है और इस हिंसा में पहली बार धार्मिक स्थलों को निशाना क्यों बनाया गया? इन्हीं सभी सवालों के जवाब तलाशने मणिपुर पहुंची बीबीसी की टीम.\n\nवीडियो: नितिन श्रीवास्तव और गुलशन कुमार | BBC News Hindi | 2493125 |  | 5715 |
| 2023-06-02 T17:00:37Z | UCSaf-7p3J_N-02p7jHzm5tA | Manipur Violence | Standoff Between Assam Rifles and Manipur Police | What We Know | Standoff between Assam Rifles and Manipur Police, just a day after Home Minister Amit Shah, during his Manipur visit, announced a unified command for better coordination between state Police, Assam Rifles, Indian Army and Central Paramilitary forces. | The Quint | 2423176 | 15787 | 5296 |
| 2023-07-10 T14:00:12Z | UCsDTy8jvHcwMvSZf_JGi-FA | Manipur violence will HURT India | Manipur situation explained by Abhi and Niyu | In this video, Abhi and Niyu explain the violence in Manipur. Since last 2 months more than 60000 people have been displaced, and more than a 100 people lost their lives in Manipur. Meitei, Kuki and Naga tribes have found themselves in a constant battle for power. What is the history of these tribes and what should the government do to solve this issue? Let's explore in this educational video about Manipur and North East India | Abhi and Niyu | 2088425 | 102065 | 4370 |
| 2023-07-21 T02:00:06Z | UCCJRFl1Qjo83GG_09U-DIBA | Manipur Violence : Manipur Women Viral Video का मुख्य आरोपी गिरफ्तार, सामने आई तस्वीर | #manipur #viralvideo #livehindustan \n\nManipur Violence : Manipur Women Viral Video का मुख्य आरोपी Herodas गिरफ्तार, सामने आई तस्वीर\n\nमणिपुर में कुकी समुदाय की दो महिलाओं को नग्न घुमाने और उनके साथ यौन उत्पीड़न करने का वीडियो सामने आने के बाद पूरे देश में आक्रोश है। इस बीच पुलिस ने मुख्य आरोपी को गिरफ्तार कर लिया है। अब मुख्य आरोपी की पहली तस्वीर सामने आई है। यह वही आरोपी बताया जा रहा है जो महिला को दोनों हाथों से दबोचे हुए दिख रहा है। वायरल वीडियो में आरोपी ने हरे रंग की टी-शर्ट पहनी हुई है। | Live Hindustan | 1834959 | 8036 | 1326 |
| 2024-07-01 T19:03:39Z | UCJEDFSxHHOW1PpBccdSxOTA | Manipur MP Angomcha Bimol Akoijam Lashes Out At BJP Over Manipur Violence In Lok Sabha | Parliament Session: During the Lok Sabha session, Manipur MP Angomcha Bimol Akoijam fiercely criticized the BJP for its handling of the Manipur violence, stating the government's failure to maintain peace and order in the state. | The Indian Express | 1475984 | 44577 | 5221 |
| 2023-07-19 T09:20:10Z | UCN7B-QD0Qgn2boVH5Q0pOWg | Manipur Violence : तीन महीने गुज़रने के बावजूद क्यों नहीं थम रही मणिपुर में सुलगती आग (BBC Hindi) | 142 लोगों की मौत, क़रीब 60,000 लोग बेघर और हिंसा का एक ऐसा चक्र जो थमने का नाम ही नहीं ले रहा है. मणिपुर में मई के महीने में शुरू हुई जातीय हिंसा दो महीने बाद भी जारी है. शायद ही कोई दिन ऐसा बीतता है जब किसी न किसी इलाक़े से हिंसक झड़पों की ख़बर न आए. राज्य के मेतेई और कुकी समुदायों के बीच संघर्ष उफ़ान पर है. और इस संकट को ख़त्म करने में हो रही देरी से लोगों में गुस्सा बढ़ रहा है. डर के साये में जी रहे ये आम लोग नहीं जानते कि उनका भविष्य क्या होगा. देखिये मणिपुर से बीबीसी संवाददाता राघवेंद्र राव और देवाशीष कुमार की ये ख़ास रिपोर्ट. | BBC News Hindi | 1457287 |  | 3975 |
| 2023-05-06 T14:07:45Z | UCJFOER35ggIWwsXh2ZDnqyg | Manipur violence: People take refuge in camps after their houses were burnt down in riots | #shorts #manipur #manipurnews #riots #youtubeshorts #shortvideo \n► Subscribe to The Economic Times for the latest video updates. It's free! - | The Economic Times | 1325480 | 43116 | 955 |
